# Supplementary material for: Fabrication of a functionalized magnetic covalent organic framework composite as an efficient adsorbent for sulfonamide extraction from food samples
Source: Royal Society of Chemistry journal article supplement (doi:10.1039/d0nj02849e), 2020-01-01
Supplement: d0nj02849e1.pdf [file d0nj02849e1.pdf]

**Supplementary material**

**Fabrication of a functionalized magnetic covalent organic framework composite as an efficient  
adsorbent for sulfonamides extraction from food samples**

Jichao Liu<sup>1</sup>, Guoliang Li<sup>1\*</sup>, Di Wu<sup>2</sup>, Xianlong Zhang<sup>1</sup>, Liangbin Hu<sup>1</sup> and Jianghua Liu<sup>1\*</sup>

<sup>1</sup> School of Food and Biological Engineering, Shaanxi University of Science and Technology, Xi'an  
710021, China.

<sup>2</sup> Institute for Global Food Security, School of Biological Sciences, Queen's University Belfast, 19  
Chlorine Gardens, Belfast, BT9 5DL, United Kingdom

**\*Corresponding author (\*)**

Mailing address: Shaanxi University of science and technology, Weiyang District, Xi'an City, Shaanxi  
Province, China.

Email address: [61254368@163.com](mailto:61254368@163.com), Fax: 029-86168293

### **1. Synthesis of Fe<sub>3</sub>O<sub>4</sub> NPs**

The magnetic Fe<sub>3</sub>O<sub>4</sub> NPs were synthesized based on our previous work [1]. In brief, FeCl<sub>3</sub>·6H<sub>2</sub>O (1.35 g) and NH<sub>4</sub>OAc (3.85 g) were firstly dispersed in ethylene glycol (70 mL). After mechanically stirring for 60 min at the room temperature, the mixture was transferred into a Teflon-lined stainless-steel autoclave. The reaction was carried out at 200 °C for 16 h. And then, the product was collected via a magnet and washed with ethanol and ultrapure water, successively. Finally, the obtained product was dried in a vacuum oven at 60 °C for 12 h.

### **2. Synthesis of Fe<sub>3</sub>O<sub>4</sub>@TbBd microspheres**

Typically, Fe<sub>3</sub>O<sub>4</sub> NPs (0.15 g) were added into DMSO (50 mL) with Tb (0.3 mmol) and Bd (0.45 mmol) [2]. Then, the mixture was ultrasonicated for 5 min. After that, anhydrous acetic acid (2 mL) was added slowly into the mixture. After incubation for 15 min at room temperature, the prepared Fe<sub>3</sub>O<sub>4</sub>@TbBd microspheres were collected by using a magnet and washed with tetrahydrofuran and anhydrous ethanol successively, then dried in vacuum at 50 °C for 8 h.

### **3. Synthesis of Fe<sub>3</sub>O<sub>4</sub>@TbBd-COOH composites**

Firstly, the Fe<sub>3</sub>O<sub>4</sub>@COF-Au microspheres were synthesized [3]. In brief, Fe<sub>3</sub>O<sub>4</sub>@TbBd (0.06 g) was dissolved in MeOH (30 mL), 1% H<sub>2</sub>AuCl<sub>4</sub>·4H<sub>2</sub>O (320 μL) was added dropwise into the mixture, then the mixture was stirred for 4 h at 0 °C. Subsequently, 0.10 mol/L NaBH<sub>4</sub> methanol solution (1 mL) was added slowly stirring for another 3 h. The obtained precipitate was separated with a help of magnet, washed with methanol and dried under vacuum for 12 h at 60 °C. After that, the Fe<sub>3</sub>O<sub>4</sub>@TbBd-COOH microspheres were synthesized through MAA as the functionalized chemical to modify Fe<sub>3</sub>O<sub>4</sub>@TbBd-Au microspheres [4]. Fe<sub>3</sub>O<sub>4</sub>@TbBd-Au (0.05 g) was added to 0.29 mM MAA ethanol solution (10 mL) with stirring for 24 h at room temperature. The product was collected with magnet, washed by absolute

ethyl alcohol and distilled water, and dried under vacuum for 8 h at 50°C [5]. Finally, the

Fe<sub>3</sub>O<sub>4</sub>@TbBd-COOH composites were synthesized.

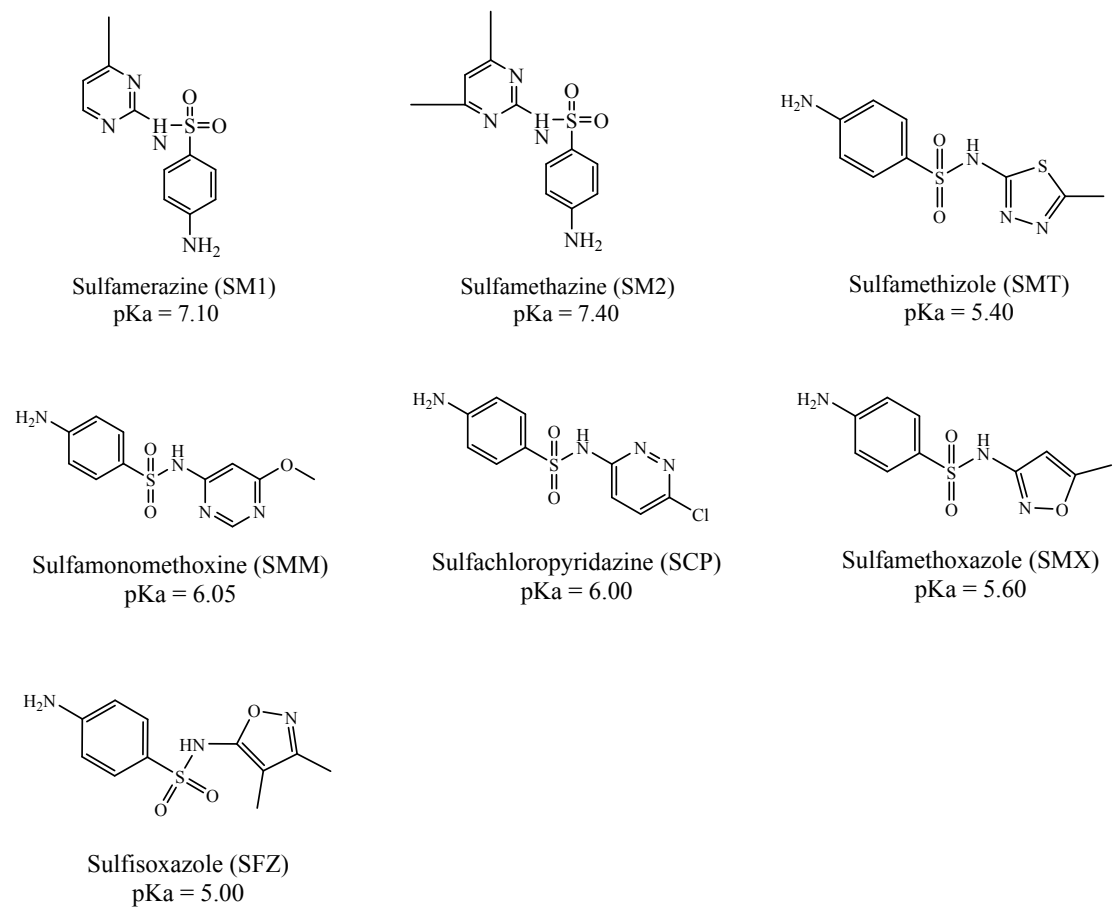

**Fig. S1** Chemical structures and pKa values of the target SAs.

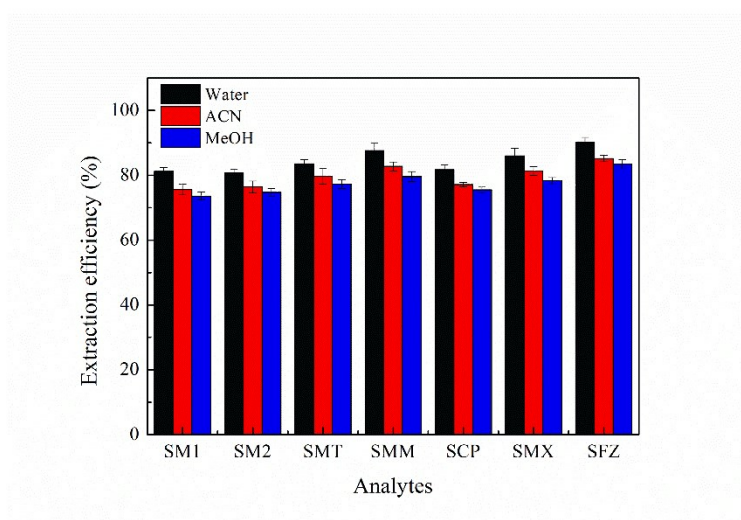

**Fig. S2** The comparison of the extraction efficiency in different solvents.

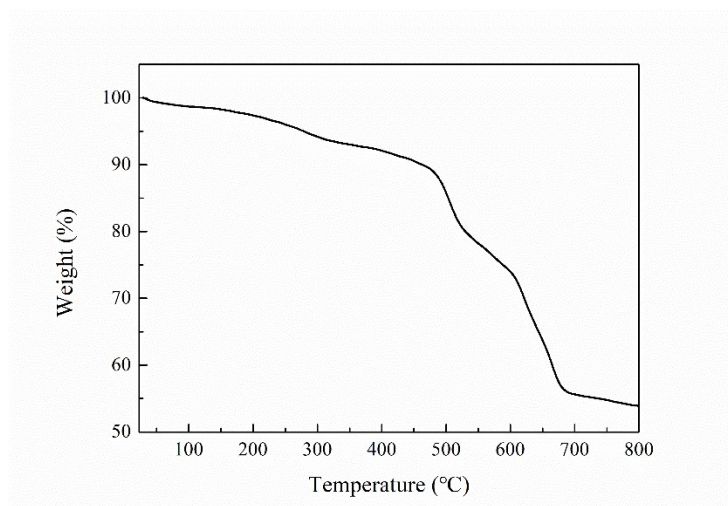

**Fig. S3** The TGA of the Fe<sub>3</sub>O<sub>4</sub>@TbBd-COOH.

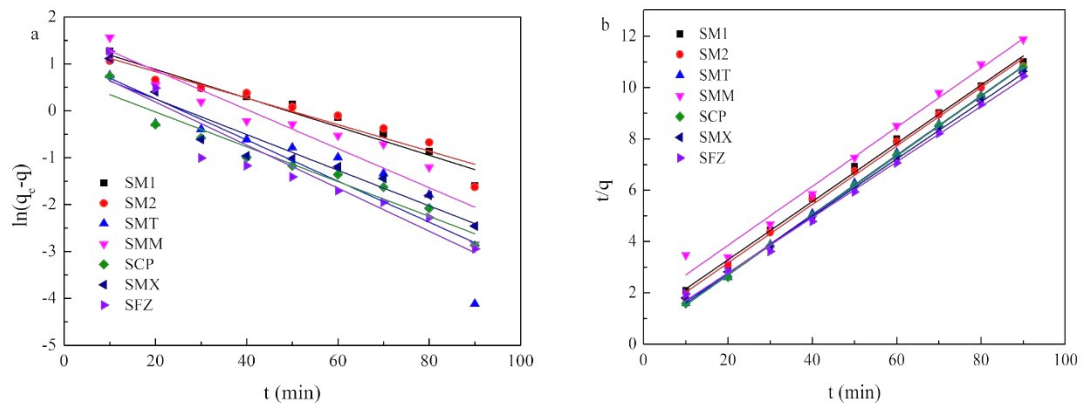

**Fig. S4** Adsorption kinetics of SAs on Fe<sub>3</sub>O<sub>4</sub>@TbBd-COOH. (a) two-parameter fit of  $\ln(q_e - q)$  with  $k_1$  using Eq. (2); (b) two-parameter fit of  $t/q$  with  $k_2$  using Eq. (3).

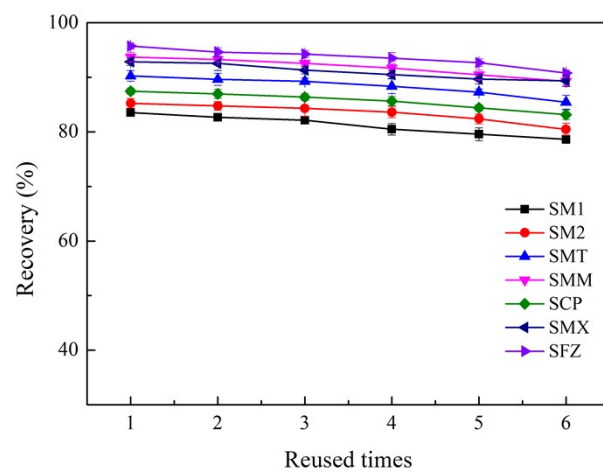

**Fig. S5** The reused times of the  $\text{Fe}_3\text{O}_4@\text{TbBd-COOH}$  towards seven SAs.



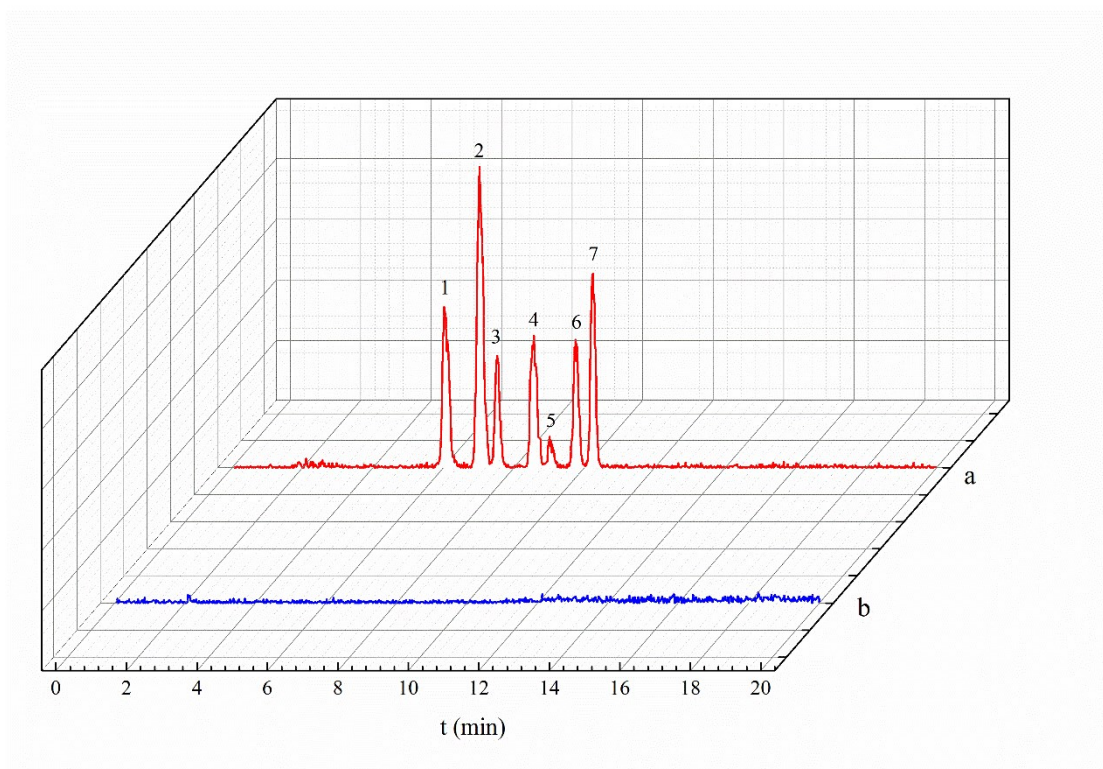

**Fig. S6** The typical chromatograms of (a) blank chicken sample spiked with 50  $\mu\text{g}/\text{kg}$  and (b) real chicken sample (Peak identification: 1, SM1; 2, SM2; 3, SMT; 4, SMM; 5, SCP; 6, SMX; 7, SFZ).

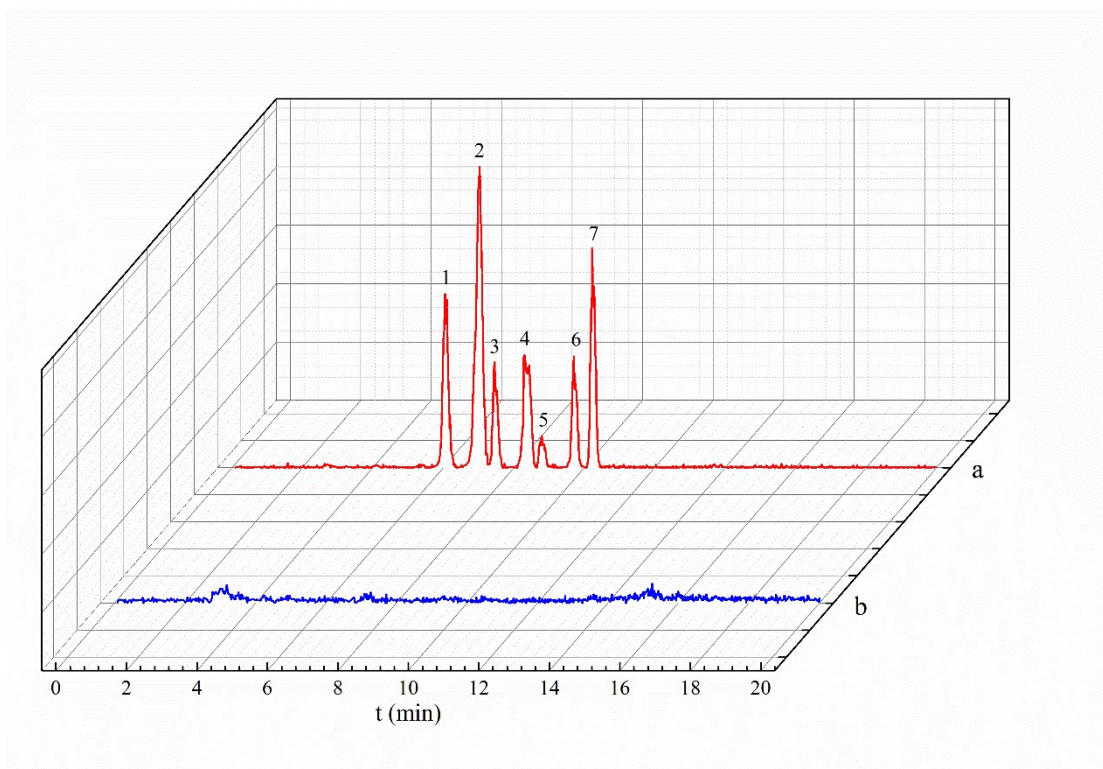

**Fig. S7** The typical chromatograms of (a) blank pork sample spiked with 50  $\mu\text{g}/\text{kg}$  and (b) real pork sample (Peak identification: 1, SM1; 2, SM2; 3, SMT; 4, SMM; 5, SCP; 6, SMX; 7, SFZ).

Table S1. Optimized HPLC-MS/MS conditions for the detection of SAs

| Analyte | Precursor ions<br>(m/z) | Product ions<br>(m/z) | Declustering<br>potential<br>(V) | Collision<br>energy (e<br>V) | Retention<br>time (min) |
|---------|-------------------------|-----------------------|----------------------------------|------------------------------|-------------------------|
| SM1     | 265.2                   | 156.0*<br>172.2       | 43.1                             | 21.4                         | 5.82                    |
| SM2     | 279.1                   | 124.0*<br>108.3       | 42.3                             | 26.8                         | 6.73                    |
| SMT     | 271.0                   | 156.1*<br>215.3       | 26.0                             | 27.5                         | 7.14                    |
| SMM     | 281.1                   | 156.2*<br>108.1       | 27.8                             | 23.5                         | 8.28                    |
| SCP     | 285.2                   | 156.1*<br>107.8       | 100.4                            | 39.5                         | 8.64                    |
| SMX     | 254.2                   | 156.0*<br>108.2       | 42.0                             | 20.0                         | 9.35                    |
| SFZ     | 268.1                   | 156.2*<br>108.2       | 32.5                             | 19.2                         | 9.81                    |

\* The product ion used for quantification.

Table S2. The kinetic parameters and coefficients of the pseudo-first order and pseudo-second order adsorption kinetic models for SAs onto Fe<sub>3</sub>O<sub>4</sub>@TbBd-COOH

| Analyte | pseudo-first order |                       |                | pseudo-second order |                       |                |
|---------|--------------------|-----------------------|----------------|---------------------|-----------------------|----------------|
|         | k <sub>1</sub>     | q <sub>e</sub> (mg/g) | R <sup>2</sup> | k <sub>2</sub>      | q <sub>e</sub> (mg/g) | R <sup>2</sup> |
| SM1     | 0.3056             | 4.465                 | 0.9484         | 1.1165              | 8.997                 | 0.9968         |
| SM2     | 0.4593             | 3.009                 | 0.9023         | 1.2576              | 8.983                 | 0.9954         |
| SMT     | 0.4389             | 3.113                 | 0.7907         | 3.0107              | 8.681                 | 0.9995         |
| SMM     | 0.4165             | 5.439                 | 0.8765         | 0.8651              | 8.670                 | 0.9903         |
| SCP     | 0.371              | 2.049                 | 0.9439         | 3.5876              | 8.642                 | 0.9998         |
| SMX     | 0.380              | 2.756                 | 0.9142         | 2.2459              | 9.004                 | 0.9993         |
| SFZ     | 0.4593             | 3.009                 | 0.9023         | 2.0087              | 9.192                 | 0.9981         |

Table S3. Calibration curve equations, correlation coefficients (R<sup>2</sup>), LODs and LOQs for SAs in a

chicken sample

| Analyte | linear range<br>(µg/kg) | linearity eq      | R <sup>2</sup> | RSD (intra-<br>day %) | RSD (inter-<br>day %) | LODs<br>(µg/kg) | LOQs<br>(µg/kg) |
|---------|-------------------------|-------------------|----------------|-----------------------|-----------------------|-----------------|-----------------|
| SM1     | 0.5-100                 | y = 385x +<br>157 | 0.9987         | 2.8                   | 4.2                   | 0.1             | 0.3             |
| SM2     | 0.5-100                 | y = 703x +<br>286 | 0.9995         | 4.3                   | 5.3                   | 0.2             | 0.7             |
| SMT     | 1-100                   | y = 289x +<br>369 | 0.9998         | 5.3                   | 6.5                   | 0.4             | 1.3             |
| SMM     | 1-100                   | y = 314x +<br>493 | 0.9997         | 3.6                   | 4.8                   | 0.4             | 1.3             |
| SCP     | 1-100                   | y = 76x +<br>66   | 0.9994         | 4.2                   | 5.1                   | 0.3             | 1.0             |
| SMX     | 0.5-100                 | y = 316x +<br>648 | 0.9993         | 3.9                   | 5.6                   | 0.3             | 1.0             |
| SFZ     | 0.5-100                 | y = 506x +<br>429 | 0.9996         | 4.4                   | 6.2                   | 0.1             | 0.3             |

Table S4. Calibration curve equations, correlation coefficients ( $R^2$ ), LODs and LOQs for SAs in a pork

| sample  |                                             |                  |        |                       |                       |                                     |                                     |
|---------|---------------------------------------------|------------------|--------|-----------------------|-----------------------|-------------------------------------|-------------------------------------|
| Analyte | linear range<br>( $\mu\text{g}/\text{kg}$ ) | linearity eq     | $R^2$  | RSD (intra-<br>day %) | RSD (inter-<br>day %) | LODs<br>( $\mu\text{g}/\text{kg}$ ) | LOQs<br>( $\mu\text{g}/\text{kg}$ ) |
| SM1     | 0.5-100                                     | $y = 270x + 249$ | 0.9998 | 3.6                   | 5.3                   | 0.1                                 | 0.3                                 |
| SM2     | 0.5-100                                     | $y = 525x + 289$ | 0.9999 | 4.2                   | 5.7                   | 0.1                                 | 0.3                                 |
| SMT     | 0.5-100                                     | $y = 156x + 396$ | 0.9997 | 2.8                   | 4.6                   | 0.2                                 | 0.7                                 |
| SMM     | 0.5-100                                     | $y = 185x + 405$ | 0.9998 | 5.2                   | 6.8                   | 0.3                                 | 1.0                                 |
| SCP     | 1-100                                       | $y = 49x + 126$  | 0.9996 | 5.1                   | 6.4                   | 0.4                                 | 1.2                                 |
| SMX     | 0.5-100                                     | $y = 170x + 538$ | 0.9999 | 3.8                   | 5.3                   | 0.2                                 | 0.7                                 |
| SFZ     | 0.5-100                                     | $y = 326x + 324$ | 0.9995 | 4.7                   | 5.9                   | 0.1                                 | 0.3                                 |

Table S5. Recovery and precision values of SAs from different spiked levels by the proposed method in beef samples

| Analytes | Sample 1 |            |        |        |       | Sample 2 |            |        |        |       | Sample 3 |            |        |       |       |
|----------|----------|------------|--------|--------|-------|----------|------------|--------|--------|-------|----------|------------|--------|-------|-------|
|          | ME       | Recovery % |        |        | RSD % | ME       | Recovery % |        |        | RSD % | ME       | Recovery % |        |       | RSD % |
|          |          | Low        | Middle | High   |       |          | Low        | Middle | High   |       |          | Low        | Middle | High  |       |
| SM1      | 0.97     | 85.34      | 86.11  | 86.68  | 4.6   | 0.95     | 86.26      | 85.69  | 86.44  | 4.1   | 0.98     | 85.67      | 86.34  | 85.82 | 4.2   |
| SM2      | 0.92     | 88.69      | 89.53  | 90.19  | 4.9   | 0.97     | 89.03      | 89.79  | 88.58  | 4.5   | 1.02     | 88.28      | 88.95  | 89.43 | 4.5   |
| SMT      | 1.03     | 93.52      | 92.84  | 92.43  | 5.4   | 1.04     | 92.85      | 91.64  | 92.28  | 4.8   | 1.05     | 93.39      | 93.82  | 92.65 | 4.2   |
| SMM      | 0.95     | 97.61      | 99.27  | 97.69  | 6.9   | 1.02     | 98.11      | 99.42  | 97.23  | 5.5   | 0.97     | 97.94      | 98.65  | 98.72 | 5.9   |
| SCP      | 0.98     | 89.71      | 88.64  | 89.95  | 5.7   | 0.96     | 89.18      | 89.78  | 90.34  | 4.2   | 0.98     | 90.64      | 90.23  | 89.75 | 4.3   |
| SMX      | 1.04     | 96.02      | 97.58  | 98.66  | 4.3   | 0.98     | 95.64      | 96.26  | 96.87  | 4.6   | 1.03     | 96.36      | 97.24  | 96.68 | 4.8   |
| SFZ      | 1.05     | 100.22     | 99.63  | 101.74 | 5.2   | 1.03     | 101.47     | 102.61 | 101.82 | 4.5   | 1.02     | 99.78      | 100.64 | 99.23 | 5.7   |

Table S6. Recovery and precision values of SAs from different spiked levels by the proposed method in chicken samples

| Analytes | Sample 1 |            |        |       |       | Sample 2 |            |        |        |       | Sample 3 |            |        |        |       |
|----------|----------|------------|--------|-------|-------|----------|------------|--------|--------|-------|----------|------------|--------|--------|-------|
|          | ME       | Recovery % |        |       | RSD % | ME       | Recovery % |        |        | RSD % | ME       | Recovery % |        |        | RSD % |
|          |          | Low        | Middle | High  |       |          | Low        | Middle | High   |       |          | Low        | Middle | High   |       |
| SM1      | 0.95     | 86.68      | 86.29  | 85.77 | 5.1   | 0.97     | 86.28      | 85.96  | 85.47  | 5.6   | 0.96     | 86.23      | 85.75  | 85.56  | 5.2   |
| SM2      | 0.98     | 90.12      | 91.35  | 90.64 | 4.6   | 0.93     | 89.68      | 90.32  | 91.51  | 6.7   | 0.95     | 91.47      | 90.58  | 90.29  | 5.3   |
| SMT      | 0.96     | 94.31      | 94.58  | 93.85 | 4.3   | 0.95     | 93.56      | 94.49  | 94.82  | 5.4   | 1.02     | 92.86      | 93.45  | 94.68  | 6.2   |
| SMM      | 1.01     | 96.74      | 97.24  | 97.62 | 5.5   | 0.96     | 97.25      | 96.81  | 96.54  | 5.1   | 1.04     | 96.52      | 95.86  | 96.77  | 5.6   |
| SCP      | 0.97     | 91.82      | 93.29  | 91.57 | 5.9   | 1.03     | 90.37      | 91.26  | 92.43  | 5.8   | 0.97     | 92.34      | 91.08  | 91.59  | 5.1   |
| SMX      | 0.94     | 95.65      | 96.82  | 97.25 | 6.4   | 1.02     | 96.52      | 96.89  | 97.24  | 4.7   | 0.94     | 95.86      | 96.31  | 97.42  | 6.3   |
| SFZ      | 1.03     | 99.85      | 101.34 | 99.36 | 5.3   | 0.96     | 98.76      | 99.21  | 100.53 | 6.5   | 0.98     | 99.27      | 99.83  | 101.64 | 5.4   |



Table S7. Recovery and precision values of SAs from different spiked levels by the proposed method in pork samples

| Analytes | Sample 1 |            |        |       |       | Sample 2 |            |        |       |       | Sample 3 |            |        |       |       |
|----------|----------|------------|--------|-------|-------|----------|------------|--------|-------|-------|----------|------------|--------|-------|-------|
|          | ME       | Recovery % |        |       | RSD % | ME       | Recovery % |        |       | RSD % | ME       | Recovery % |        |       | RSD % |
|          |          | Low        | Middle | High  |       |          | Low        | Middle | High  |       |          | Low        | Middle | High  |       |
| SM1      | 0.96     | 86.94      | 85.63  | 85.78 | 6.1   | 0.95     | 85.62      | 86.36  | 85.67 | 5.3   | 0.98     | 85.86      | 86.52  | 87.77 | 5.2   |
| SM2      | 1.03     | 90.39      | 91.42  | 90.65 | 5.6   | 0.98     | 91.23      | 90.66  | 90.48 | 4.8   | 0.93     | 90.82      | 90.49  | 92.11 | 5.4   |
| SMT      | 1.02     | 93.76      | 94.38  | 94.51 | 5.3   | 1.03     | 94.52      | 94.83  | 93.56 | 5.1   | 0.95     | 94.28      | 94.83  | 93.42 | 4.9   |
| SMM      | 0.95     | 96.85      | 96.57  | 97.36 | 4.8   | 0.97     | 96.82      | 97.37  | 98.56 | 5.7   | 0.96     | 96.57      | 95.88  | 97.24 | 5.5   |
| SCP      | 0.97     | 90.56      | 91.23  | 91.87 | 5.4   | 0.98     | 91.28      | 91.76  | 92.15 | 4.9   | 1.02     | 91.68      | 92.43  | 91.89 | 5.2   |
| SMX      | 0.94     | 94.87      | 96.34  | 96.57 | 5.5   | 0.96     | 95.86      | 96.48  | 95.39 | 5.2   | 1.05     | 95.39      | 96.48  | 94.82 | 5.6   |
| SFZ      | 0.92     | 98.82      | 99.64  | 99.39 | 5.3   | 1.03     | 101.34     | 100.46 | 99.53 | 5.4   | 0.97     | 98.64      | 101.34 | 99.64 | 6.1   |

## References

1. N. Li, D. Wu, N. Hu, G. Fan, X. Li, J. Sun, X. Chen, Y. Suo, G. Li and Y. Wu, Effective enrichment and detection of trace polycyclic aromatic hydrocarbons in food samples based on magnetic covalent organic framework hybrid microspheres. *J. Agric. Food Chem.*, 2018, 66(13), 3572-3580.
2. C. Gao, G. Lin, Z. Lei, Q. Zheng, J. Lin and Z. Lin, Facile synthesis of core-shell structured magnetic covalent organic framework composite nanospheres for selective enrichment of peptides with simultaneous exclusion of proteins. *J. Mater. Chem. B*, 2017, 5, 7496-7503.
3. Y. Su, D. Wu, J. Chen, G. Cheng, N. Hu, H. Wang, P. Wang, H. Han, G. Li and Y. Wu, Ratiometric Surface Enhanced Raman Scattering Immunosorbent Assay of Allergenic Proteins via Covalent Organic Framework Composite Material Based Nanozyme Tag Triggered Raman Signal “Turn-on” and Amplification. *Anal. Chem.*, 2019, 91(18), 11687-11695.
4. X. Liu, Z. Sun, G. Chen, W. Zhang, Y. Cai, R. Kong, X. Wang, Y. Suo and J. You, Determination of phthalate esters in environmental water by magnetic Zeolitic Imidazolate Framework-8 solid-phase extraction coupled with high-performance liquid chromatography. *J. Chromatogr. A*, 2015, 1409, 46-52.
5. T. Zhang, X. Zhang, X. Yan, L. Kong, G. Zhang, H. Liu, J. Qiu, and K. L. Yeung, Synthesis of Fe<sub>3</sub>O<sub>4</sub>@ZIF-8 magnetic core-shell microspheres and their potential application in a capillary microreactor. *Chem. Eng. J.*, 2013, 228, 398-404.
